# Supplementary material for: Impact of the COVID-19 pandemic on acute mental health admissions in Croatia
Source: Front Public Health. 2023 Nov 13;11:1231796. doi: 10.3389/fpubh.2023.1231796 (PMC10679393; doi:10.3389/fpubh.2023.1231796)
Supplement: Supplementary file 1 [file Data_Sheet_1.xlsx]

## Sheet: 2017 U
NUMBER		Admissions
			U60Z	U61A	U61B	U62A	U62B	U63A	U63B	U64Z	U65Z	U66Z	U67Z	U68Z
	HOSPITAL	19406	80	81	5840	59	2310	466	4493	593	792	172	3910	610
1	University Hospital Center Split	1295		12	611	5	171	24	197	31	19	10	206	9
2	University Hospital Center Zagreb	1200			228	1	138	39	303	51	32	39	291	78
3	University Hospital Center Osijek	1147	2		317	2	141	30	280	41	22	9	276	27
4	University Hospital Center Rijeka	1187	27	8	292	7	165	27	301	18	32	3	236	71
5	University Hospital Center Sestre milosrdnice	670	1	4	155	3	65	16	148	14	12	42	76	134
6	Clinical Hospital Dubrava	534	2		16		13	20	283	41	17	2	140
7	Clinical Hospital Sveti duh	7					1				4		1	1
8	Clinical Hospital Merkur	1								1
9	Clinic for infective diseases "Fran Mihaljević"	2					2
10	Children's Hospital Zagreb	117	2							7	9	13	12	74
11	Children's Hospital Srebrnjak	1									1
12	General Hospital Gospić	2							1		1
13	General Hospital Knin General and Veteran Hospital "Hrvatski ponos"	2								1			1
14	Vukovar General Hospital and Croatian Veterans Hospital	433			79	2	32	20	182	20	9		89
15	General Hospital Bjelovar	742			131	2	125	28	223	23	13	2	192	3
16	County Hospital Čakovec	476	6	2	154		38	14	110	3	7	1	141
17	General Hospital Dubrovnik	385			166	1	67	12	75	3	9	2	49	1
18	General Hospital Karlovac	294			62	1	51	6	86	19	4	1	62	2
19	General Hospital Koprivnica	482	4		141	4	77	10	111	24	9	1	98	3
20	General County Hospital Našice	265	2		52		13	9	110	5	2	1	71
21	General Hospital & Hospital of Homeland War Veterans Ogulin	29			10	1	12	1	2		1		2
22	General Hospital Požega	190	1		33	1	11	4	19	38	13		69	1
23	General Hospital Pula	524	3		178		90	13	107	8	11	4	108	2
24	General Hospital Sisak	11	2							2	3	1	1	2
25	General Hospital Slavonski Brod	662		9	143	3	78	32	185	20	24	2	161	5
26	General Hospital Šibenik	417		2	198		82	7	69	4	2	1	50	2
27	General Hospital Varaždin	433	6	1	127		44	6	54	31	14	2	148
28	General Hospital Vinkovci	506	1		167	2	109	26	101	13	10	1	75	1
29	General Hospital Virovitica	296	5		78		22	10	133	5	5	1	37
30	General Hospital and Croatian Veterans Hospital Zabok	7					2		1	1	2		1
31	General Hospital Nova Gradiška	51			11		3	5	18	6	4		4
32	General Hospital Zadar	488	1	4	160	2	78	16	127	10	12	1	77
33	Psychiatric Hospital Vrapče	2884	9	2	1113	2	285	25	480	77	438	7	443	3
34	Psychiatric Hospital Rab	237			120		11	8	33	5	3	1	56
35	Psychiatric Hospital Ugljan	428			346		30	9	17	1			23	2
36	Psychiatric Hospital Sv. Ivan	1086	5	4	288	3	149	9	282	42	19	14	271
37	Psychiatric Hospital Popovača	1366		33	457	17	172	40	384	28	26	3	203	3
38	Special Hospital Goljak	70												70
39	Psychiatric hospital for children and youth	479	1		7		33		71		3	8	240	116

## Sheet: 2018 U
NUMBER		Admissions
			U60Z	U61A	U61B	U62A	U62B	U63A	U63B	U64Z	U65Z	U66Z	U67Z	U68Z
	HOSPITAL	17675	78	67	5293	64	2232	413	3796	535	453	149	3866	729
1	University Hospital Center Split	1320	1	11	592	20	210	37	182	30	16	7	195	19
2	University Hospital Center Zagreb	1124	1	1	202	2	129	25	264	49	23	24	324	80
3	University Hospital Center Osijek	1133			290		127	33	277	21	20	17	300	48
4	University Hospital Center Rijeka	1151	30	12	284	7	118	25	293	12	21	13	276	60
5	University Hospital Center Sestre milosrdnice	573		1	130		57	16	128	16	8	29	49	139
6	Clinical Hospital Sveti duh	2					1				1
7	Children's Hospital Zagreb	103	2							4	7	12	5	73
8	Clinical Hospital Dubrava	550			10		14	22	288	31	20	1	164
9	Children's Hospital Srebrnjak	2										1		1
10	General Hospital Gospić	5						1	1		1		2
11	General Hospital Knin General and Veteran Hospital "Hrvatski ponos"	2								2
12	Vukovar General Hospital and Croatian Veterans Hospital	414			71		45	16	121	18	9		134
13	General Hospital Bjelovar	567	1		159		58	23	163	30	14		119
14	County Hospital Čakovec	406	11		134	1	42	8	89	5	5		111
15	General Hospital Dubrovnik	381			161		77	11	88	4	5	1	34
16	General Hospital Karlovac	253			68	1	52	7	45	10	4	2	64
17	General Hospital Koprivnica	429	2	1	108	1	66	15	100	34	10	1	89	2
18	General County Hospital Našice	274			51		27	6	122	7	4		57
19	General Hospital & Hospital of Homeland War Veterans Ogulin	16			2		7		1		2		4
20	General Hospital Požega	232			51	2	15	5	39	35	8		76	1
21	General Hospital Pula	493		5	181	2	76	20	88	4	7	2	108
22	General Hospital Sisak	6								1	2	1	1	1
23	General Hospital Slavonski Brod	511		3	121	3	83	17	121	16	13	4	127	3
24	General Hospital Šibenik	379	3	2	172	2	90	5	57	10	2	4	31	1
25	General Hospital Varaždin	445			103	1	73	2	86	30	16		133	1
26	General Hospital Vinkovci	453	1		163	4	99	9	71	8	12		85	1
27	General Hospital Virovitica	406	1		120		37	12	181	11	4		40
28	General Hospital and Croatian Veterans Hospital Zabok	1											1
29	General Hospital Nova Gradiška	269	3		43		21	18	83	25	16		60
30	General Hospital Pakrac	4							4
31	General Hospital Zadar	416		4	121	3	90	21	78	9	11	3	71	5
32	Psychiatric Hospital Vrapče	2520	17	5	1147		261	25	381	62	152	4	460	6
33	Psychiatric Hospital Rab	308		5	127	1	26	6	41	4	6	1	91
34	Psychiatric Hospital Ugljan	412			312		47	3	23	3	1		23
35	Psychiatric Hospital Sv. Ivan	727	5	2	141		149	3	199	22	8	9	189
36	Psychiatric Hospital Popovača	721		15	227	14	94	22	144	21	19	1	164
37	Special Hospital Goljak	75												75
38	Psychiatric hospital for children and youth	592			2		41		38	1	6	12	279	213

## Sheet: 2019 U
NUMBER		Admissions
			U60Z	U61A	U61B	U62A	U62B	U63A	U63B	U64Z	U65Z	U66Z	U67Z	U68Z
	HOSPITAL	17715	79	60	5198	68	2323	409	3799	567	346	136	3948	782
1	University Hospital Center Split	1266	3	23	524	18	199	25	192	31	8	12	206	25
2	University Hospital Center Zagreb	1097	1		175	3	126	31	259	29	57	32	320	64
3	University Hospital Center Osijek	1084			261		123	25	308	29	17	19	264	38
4	University Hospital Center Rijeka	1115	18	7	293	2	185	28	226	11	17	11	259	58
5	University Hospital Center Sestre milosrdnice	609		2	120	1	82	5	128	24	13	24	50	160
6	Children's Hospital Zagreb	75								2	2	6	2	63
7	Clinical Hospital Dubrava	536			15		10	19	312	28	10		142
8	Children's Hospital Srebrnjak	2									2
9	General Hospital Knin General and Veteran Hospital "Hrvatski ponos"	2								1	1
10	Vukovar General Hospital and Croatian Veterans Hospital	406			70	2	35	8	110	28	8		145
11	General Hospital Bjelovar	477	1	1	154	1	50	14	103	25	21	1	106
12	County Hospital Čakovec	463	12	1	164	2	36	4	94	5	4		141
13	General Hospital Dubrovnik	403			132		100	12	98	6	5		50
14	General Hospital Karlovac	259			70	3	51	9	48	5	4	1	67	1
15	General Hospital Koprivnica	437	7		119	1	77	15	93	17	12	1	94	1
16	General County Hospital Našice	243	2		32		12	5	140	6			46
17	General Hospital & Hospital of Homeland War Veterans Ogulin	4			1		3
18	General Hospital Požega	228			52		25	5	33	41	2		70
19	General Hospital Pula	425		10	133	3	58	16	81	4	6	1	112	1
20	General Hospital Sisak	6								2	3			1
21	General Hospital Slavonski Brod	459		4	105	5	48	23	117	21	16	2	117	1
22	General Hospital Šibenik	366			157	2	95	8	69	8	1		26
23	General Hospital Varaždin	428	5	1	110		69	1	59	17	1	1	164
24	General Hospital Vinkovci	447	1		160	1	74	20	75	10	4		101	1
25	General Hospital Virovitica	335			92		26	13	158	14	10		22
26	General Hospital Nova Gradiška	233	1		28		22	27	49	26	18		61	1
27	General Hospital Pakrac	2							1				1
28	General Hospital Zadar	415	3	6	101	3	104	20	91	11	12	3	60	1
29	Psychiatric Hospital Vrapče	2386	21		1095		293	16	389	62	43	4	457	6
30	Psychiatric Hospital Rab	290	1	1	126	2	19	9	40	9	1		82
31	Psychiatric Hospital Ugljan	390			302		33	9	13		1		32
32	Psychiatric Hospital Sv. Ivan	750	3	1	156		146	6	175	47	17	8	191
33	Psychiatric Hospital Popovača	1342		3	451	19	197	36	305	45	27	2	256	1
34	Special Hospital Goljak	89												89
35	Psychiatric hospital for children and youth	646					25		33	3	3	8	304	270

## Sheet: 2020 U
NUMBER		Admissions
			U60Z	U61A	U61B	U62A	U62B	U63A	U63B	U64Z	U65Z	U66Z	U67Z	U68Z
	HOSPITAL	13921	59	77	4201	93	2033	324	2799	383	282	166	2941	563
1	University Hospital Center Split	1004	2	14	424	17	211	15	141	17	12	10	125	16
2	University Hospital Center Zagreb	870	1		124		104	16	185	33	32	47	249	79
3	University Hospital Center Osijek	835			225		94	28	187	18	17	12	222	32
4	University Hospital Center Rijeka	915	6	6	291	8	120	29	182	11	27	16	178	41
5	University Hospital Center Sestre milosrdnice	446		1	107	5	68	13	103	15	11	23	45	55
6	Clinical Hospital Dubrava	219	2		8		2	9	120	8	3	2	65
7	Children's Hospital Zagreb	41								2	8	6	3	22
8	Clinic for infective diseases "Fran Mihaljević"	1					1
9	General Hospital Gospić	2								1			1
10	General Hospital Knin General and Veteran Hospital "Hrvatski ponos"	1									1
11	Vukovar General Hospital and Croatian Veterans Hospital	347			60	2	42	7	98	26	6	1	105
12	General Hospital Bjelovar	391		2	129	1	34	14	97	11	5	1	94	3
13	County Hospital Čakovec	355	6	3	90		40	4	84	14	2		112
14	General Hospital Dubrovnik	370			136		64	10	107	7	3	1	42
15	General Hospital Karlovac	243			73	1	56	7	41	7	3		55
16	General Hospital Koprivnica	289	4		84	2	45	6	57	17	7		62	5
17	General County Hospital Našice	192			41		13	10	87		1		40
18	General Hospital Požega	129	1		29		10	6	29	15	3		36
19	General Hospital Pula	414	1	7	138	4	60	15	85	2	5	2	93	2
20	General Hospital Slavonski Brod	365		5	88	4	72	21	93	8	4	1	67	2
21	General Hospital Šibenik	307	2		125	2	85	12	50	1	2	3	25
22	General Hospital Varaždin	237	1	1	67		46	2	29	12	2		76	1
23	General Hospital Vinkovci	319			96	2	70	12	46	7	5	1	80
24	General Hospital Virovitica	325			84		28	10	164	16	10		13
25	General Hospital and Croatian Veterans Hospital Zabok	1									1
26	General Hospital Nova Gradiška	99	3		17		12	7	18	17	1		24
27	General Hospital Pakrac	1							1
28	General Hospital Zadar	304	2	4	116	10	70	7	49	9	6	2	28	1
29	Psychiatric Hospital Vrapče	1891	19	10	844	2	274	13	254	37	55	2	377	4
30	Psychiatric Hospital Rab	311		9	140	5	26	8	42	7	5	2	67
31	Psychiatric Hospital Ugljan	337	1	4	249	10	30	5	26				12
32	Psychiatric Hospital Sv. Ivan	923	8		183		182	8	203	37	24	23	255
33	Psychiatric Hospital Popovača	902		11	233	18	157	30	201	27	21		204
34	Special Hospital Goljak	81												81
35	Psychiatric hospital for children and youth	454					17		20	1		11	186	219

## Sheet: 2021 U
NUMBER		Admissions
			U60Z	U61A	U61B	U62A	U62B	U63A	U63B	U64Z	U65Z	U66Z	U67Z	U68Z
	HOSPITAL	14019	68	109	4240	92	1986	302	2772	439	255	228	2675	853
1	University Hospital Center Split	940	2	23	380	25	202	12	138	16	12	8	115	7
2	University Hospital Center Zagreb	509	1		38	1	23	4	70	15	34	62	162	99
3	University Hospital Center Osijek	929	1		202	1	130	25	211	18	17	16	249	59
4	University Hospital Center Rijeka	960	17	6	257	2	146	31	203	9	10	14	210	55
5	University Hospital Center Sestre milosrdnice	418		3	109	3	58	16	101	17	9	49	49	4
6	Clinical Hospital Dubrava	143			3		5	2	77	11	5		40
7	Clinical Hospital Merkur	1					1
8	Children's Hospital Zagreb	30					1			3	4	7	2	13
9	Children's Hospital Srebrnjak	1												1
10	General Hospital Knin General and Veteran Hospital "Hrvatski ponos"	1												1
11	Vukovar General Hospital and Croatian Veterans Hospital	304			66		34	6	65	10	9		114
12	General Hospital Bjelovar	326			101		39	15	84	16	7	2	60	2
13	County Hospital Čakovec	347	6	2	111		45	3	59	10	3		108
14	General Hospital Dubrovnik	303		8	123	4	46	11	60	5	2	5	37	2
15	General Hospital Karlovac	223			65	1	50	3	41	6	4	2	51
16	General Hospital Koprivnica	341	7	1	73	1	42	10	93	29	16	1	68
17	General County Hospital Našice	158	2		26	1	8	7	77	2	3		32
18	General Hospital & Hospital of Homeland War Veterans Ogulin	1			1
19	General Hospital Požega	71			21	1	7	1	11	9	4	2	13	2
20	General Hospital Pula	444			155	3	84	13	81	6	2	1	97	2
21	General Hospital Slavonski Brod	412		4	101	4	83	16	107	18	2	2	74	1
22	General Hospital Šibenik	289			113	1	65	23	61	6		5	15
23	General Hospital Varaždin	242	1	2	87	2	28	2	43	11	8	3	53	2
24	General Hospital Vinkovci	280	1		97	2	75	4	39	5	4	2	51
25	General Hospital Virovitica	382	3		120		53	10	149	20	12		15
26	General Hospital and Croatian Veterans Hospital Zabok	3									3
27	General Hospital Nova Gradiška	5	1						2		1		1
28	General Hospital Pakrac	5					1	1		2			1
29	General Hospital Zadar	260	1	1	73	2	77	8	48	4	13	1	29	3
30	Psychiatric Hospital Vrapče	2215	21	25	958	11	283	31	384	110	33	17	334	8
31	Psychiatric Hospital Rab	605	1	19	273	8	67	18	105	6	6	2	100
32	Psychiatric Hospital Ugljan	321		6	220	4	36	2	24				29
33	Psychiatric Hospital Sv. Ivan	761	3	1	118		134	12	209	35	17	17	215
34	Psychiatric Hospital Popovača	987		8	347	15	145	16	204	35	13	2	202
35	Special Hospital Goljak	104												104
36	Psychiatric hospital for children and youth	698			2		18		26	5	2	8	149	488

## Sheet: 2022 U
NUMBER		Admissions
			U60Z	U61A	U61B	U62A	U62B	U63A	U63B	U64Z	U65Z	U66Z	U67Z	U68Z
	HOSPITAL	14702	87	92	4193	80	1959	317	2827	562	292	201	3017	1075
1	University Hospital Center Split	997		18	358	22	243	25	125	26	14	5	141	20
2	University Hospital Center Zagreb	566	1		37		27	11	97	29	25	43	181	115
3	University Hospital Center Osijek	955			248	1	122	23	229	19	7	18	224	64
4	University Hospital Center Rijeka	1000	22	8	257	6	146	30	186	6	14	13	232	80
5	University Hospital Center Sestre milosrdnice	469			134	2	67	11	121	15	18	50	47	4
6	Clinical Hospital Dubrava	207			5		6	6	93	13	9		75
7	Children's Hospital Zagreb	15								1	2	4	1	7
8	General Hospital Gospić	4											3	1
9	General Hospital Knin General and Veteran Hospital "Hrvatski ponos"	1								1
10	Vukovar General Hospital and Croatian Veterans Hospital	341			59	1	26	8	92	27	8	1	119
11	General Hospital Bjelovar	363	2	1	112		31	8	71	42	21	2	73
12	County Hospital Čakovec	421	11	1	102		45	8	45	12	9		188
13	General Hospital Dubrovnik	296		7	98	2	35	9	88	7	2	2	40	6
14	General Hospital Karlovac	230			70	2	51	3	35	6	2	2	58	1
15	General Hospital Koprivnica	370	4	1	81		45	8	89	30	18	2	91	1
16	General County Hospital Našice	193			35		8	15	100	3	1	1	30
17	General Hospital & Hospital of Homeland War Veterans Ogulin	3							3
18	General Hospital Požega	101	1		20		9	10	24	7	7		23
19	General Hospital Pula	479		4	132	5	82	25	117	3	4		107
20	General Hospital Slavonski Brod	428		6	119	4	75	14	109	25	10	3	56	7
21	General Hospital Šibenik	308	1		117		77	9	73	5		4	22
22	General Hospital Varaždin	269	2	2	90	3	30	1	59	11	5	1	63	2
23	General Hospital Vinkovci	337	1		131		76	9	41	12	10		55	2
24	General Hospital Virovitica	372	7		105		47	9	140	36	12		16
25	General Hospital and Croatian Veterans Hospital Zabok	3					1				1		1
26	General Hospital Pakrac	2			2
27	General Hospital Zadar	261	9	1	72	1	71	15	50	10	8	1	20	3
28	Psychiatric Hospital Vrapče	2334	20	18	969	3	279	17	386	122	42	14	455	9
29	Insula County Hospital	279	1	13	85	4	20	9	42	9	5	1	90
30	Psychiatric Hospital Ugljan	346		6	250	5	50	1	12	1		1	20
31	Psychiatric Hospital Sv. Ivan	606	1		116		106	3	142	47	14	18	159
32	Psychiatric Hospital Popovača	1135	4	6	388	19	162	30	238	32	22	2	232
33	Special Hospital Goljak	118												118
34	Psychiatric hospital for children and youth	893			1		22		20	5	2	13	195	635

## Sheet: 2017 V
NUMBER		Admissions
		Total cases	V60A	V60B	V61Z	V62A	V62B	V63A	V63B	V64Z
	HOSPITAL	5955	55	1572	358	3418	25	170	58	299
1	University Hospital Center Split	120	1	20	4	85				10
2	University Hospital Center Zagreb	42		8	1	27		1	2	3
3	University Hospital Center Osijek	159		23	1	125				10
4	University Hospital Center Rijeka	452	2	162	8	224	9	10	10	27
5	Clinical Hospital Sveti duh	1							1
6	University Hospital Center Sestre milosrdnice	631		36	214	360	1	6	3	11
7	Clinical Hospital Dubrava	17		8		2		2	1	4
8	Clinical Hospital Merkur	4		1	1					2
9	Children's Hospital Zagreb	3		1	2
10	General Hospital Gospić	2		1						1
11	Vukovar General Hospital and Croatian Veterans Hospital	65	1	10		50		1		3
12	General Hospital Bjelovar	133		4		127				2
13	County Hospital Čakovec	191	1	49	3	106	3	19	6	4
14	General Hospital Dubrovnik	98		19	6	57	3	4	1	8
15	General Hospital Karlovac	136		45	2	86			1	2
16	General Hospital Koprivnica	181	2	13	2	159	1			4
17	General County Hospital Našice	49		5		42	1		1
18	General Hospital & Hospital of Homeland War Veterans Ogulin	7	1	4		2
19	General Hospital Požega	51		5	1	43	1			1
20	General Hospital Pula	229		106	27	64	3	9	6	14
21	General Hospital Sisak	3		2						1
22	General Hospital Slavonski Brod	148	2	35	2	101		1	1	6
23	General Hospital Šibenik	72	2	12	2	48		1		7
24	General Hospital Varaždin	223	1	20	4	186		5	4	3
25	General Hospital Vinkovci	136		23	4	95		3	2	9
26	General Hospital Virovitica	72		12		57	1			2
27	General Hospital and Croatian Veterans Hospital Zabok	9	2	4	1	1				1
28	General Hospital Zadar	67	2	8	2	44		3	2	6
29	General Hospital Nova Gradiška	15		1		14
30	Psychiatric Hospital Vrapče	1642	34	791	59	563		78	13	104
31	Psychiatric Hospital Rab	212		8	5	158	2	19		20
32	Psychiatric Hospital Ugljan	72	1	4	1	66
33	Psychiatric Hospital Sv. Ivan	269		73	4	163		5	4	20
34	Psychiatric Hospital Popovača	430	3	58		363		3		3
35	Psychiatric hospital for children and youth	13		1	1					11

## Sheet: 2018 V
NUMBER		Admissions
		Total cases	V60A	V60B	V61Z	V62A	V62B	V63A	V63B	V64Z
	HOSPITAL	5435	38	1408	314	3059	43	142	62	369
1	University Hospital Center Split	128	1	15	1	94		5		12
2	University Hospital Center Zagreb	48	1	12	4	25				6
3	University Hospital Center Osijek	151		8	1	121		1		20
4	University Hospital Center Rijeka	468	3	159	13	203	11	11	22	46
5	Clinical Hospital Sveti duh	4		2						2
6	University Hospital Center Sestre milosrdnice	573	1	30	181	323		11	11	16
7	Clinical Hospital Dubrava	12	1	2		2		2		5
8	Clinical Hospital Merkur	2		1						1
9	Children's Hospital Zagreb	1		1
10	General Hospital Gospić	5		4						1
11	General Hospital Knin General and Veteran Hospital "Hrvatski ponos"	1		1
12	Vukovar General Hospital and Croatian Veterans Hospital	62	1	3		53		4	1
13	General Hospital Bjelovar	155		2		150				3
14	County Hospital Čakovec	196	1	36	3	119	14	9	4	10
15	General Hospital Dubrovnik	92		17	3	65	4	1	1	1
16	General Hospital Karlovac	110		27	5	73		1		4
17	General Hospital Koprivnica	175		19		147	5			4
18	General County Hospital Našice	34		8		26
19	General Hospital & Hospital of Homeland War Veterans Ogulin	4	1	1		2
20	General Hospital Požega	43		2		40				1
21	General Hospital Pula	197	1	76	34	55		6	3	22
22	General Hospital Sisak	3		3
23	General Hospital Slavonski Brod	101		18	3	70		3		7
24	General Hospital Šibenik	68		18		45		1		4
25	General Hospital Varaždin	183		22	2	145	1	1	1	11
26	General Hospital Vinkovci	129	1	25	1	89		5	2	6
27	General Hospital Virovitica	56	3	38		14	1
28	General Hospital and Croatian Veterans Hospital Zabok	11		8		1	1			1
29	General Hospital Zadar	77	2	14	1	46	1	3	4	6
30	General Hospital Nova Gradiška	112	1	31	1	71	3			5
31	General Hospital Pakrac	2		2
32	Psychiatric Hospital Vrapče	1565	17	673	56	610	1	52	12	144
33	Psychiatric Hospital Rab	201	1	13	1	153	1	21		11
34	Psychiatric Hospital Ugljan	69				67		1		1
35	Psychiatric Hospital Sv. Ivan	187		65	2	105		2		13
36	Psychiatric Hospital Popovača	208	2	52	2	145		2	1	4
37	Psychiatric hospital for children and youth	2								2

## Sheet: 2019 V
NUMBER		Admissions
			V60A	V60B	V61Z	V62A	V62B	V63A	V63B	V64Z
	HOSPITAL	5801	49	1486	344	3263	40	160	59	400
1	University Hospital Center Split	160	2	21	10	116		1	3	7
2	University Hospital Center Zagreb	38	1	9	1	19				8
3	University Hospital Center Osijek	134		16	3	100		3		12
4	University Hospital Center Rijeka	471	3	163	6	224	13	10	13	39
5	University Hospital Center Sestre milosrdnice	590	2	33	164	346		23	7	15
6	Clinical Hospital Sveti duh	1		1
7	Clinical Hospital Dubrava	17	1	1		6			1	8
8	Clinical Hospital Merkur	4								4
9	Children's Hospital Zagreb	7		7
10	General Hospital Gospić	2		2
11	General Hospital Knin General and Veteran Hospital "Hrvatski ponos"	2		2
12	Vukovar General Hospital and Croatian Veterans Hospital	49		2		41	1	3		2
13	General Hospital Bjelovar	69	1	4	2	61				1
14	County Hospital Čakovec	200	1	46	1	116	8	6	2	20
15	General Hospital Dubrovnik	108		24		71	6		3	4
16	General Hospital Karlovac	110		11	4	85		2	1	7
17	General Hospital Koprivnica	166		26		131	4			5
18	General County Hospital Našice	31		6		24				1
19	General Hospital & Hospital of Homeland War Veterans Ogulin	3	1	2
20	General Hospital Požega	53		1		48		1		3
21	General Hospital Pula	218		84	25	52		14	7	36
22	General Hospital Slavonski Brod	131	2	19	4	101		1		4
23	General Hospital Šibenik	96	1	25	3	55			1	11
24	General Hospital Varaždin	185	1	26	9	141		1	2	5
25	General Hospital Vinkovci	189	2	31	2	139		5	4	6
26	General Hospital Virovitica	74	10	57	4	2				1
27	General Hospital and Croatian Veterans Hospital Zabok	3		3
28	General Hospital Zadar	52		7	4	35			1	5
29	General Hospital Nova Gradiška	111	2	35	1	66	3			4
30	General Hospital Pakrac	1								1
31	Psychiatric Hospital Vrapče	1563	16	659	94	564	5	61	12	152
32	Psychiatric Hospital Rab	201		5	4	163		14	1	14
33	Psychiatric Hospital Ugljan	83				82		1
34	Psychiatric Hospital Sv. Ivan	243		73		145		7	1	17
35	Psychiatric Hospital Popovača	430	3	82	3	330		7		5
36	Psychiatric hospital for children and youth	6		3						3

## Sheet: 2020 V
NUMBER		Admissions
		Total cases	V60A	V60B	V61Z	V62A	V62B	V63A	V63B	V64Z
	HOSPITAL	4090	32	1059	177	2344	25	125	48	280
1	University Hospital Center Split	95	5	14	3	54		1	1	17
2	University Hospital Center Zagreb	28		5		19			2	2
3	University Hospital Center Osijek	83	2	8	2	68				3
4	University Hospital Center Rijeka	392	1	171	11	145	9	14	7	34
5	University Hospital Center Sestre milosrdnice	370		16	67	227	1	37	8	14
6	Clinical Hospital Sveti duh	5		4						1
7	Clinical Hospital Dubrava	10		2		3		1		4
8	Children's Hospital Zagreb	5		5
9	General Hospital Gospić	2		1		1
10	General Hospital Knin General and Veteran Hospital "Hrvatski ponos"	1		1
11	Vukovar General Hospital and Croatian Veterans Hospital	53	1	6		41		2	1	2
12	General Hospital Bjelovar	85		7		73	1			4
13	County Hospital Čakovec	151		35	1	94	3	7	2	9
14	General Hospital Dubrovnik	102		16	4	76	1	2	1	2
15	General Hospital Karlovac	95		13	2	77		1	1	1
16	General Hospital Koprivnica	108		8	4	91	1			4
17	General County Hospital Našice	14	2			10			1	1
18	General Hospital Požega	16		2		14
19	General Hospital Pula	171	1	62	20	58		3	9	18
20	General Hospital Sisak	3		2						1
21	General Hospital Slavonski Brod	81	1	8	2	70
22	General Hospital Šibenik	55	2	14	4	28		3	1	3
23	General Hospital Varaždin	93	2	20	3	60				8
24	General Hospital Vinkovci	101	1	8		81		5		6
25	General Hospital Virovitica	37	2	14	1	20
26	General Hospital and Croatian Veterans Hospital Zabok	5		2	2					1
27	General Hospital Zadar	29	1	3	1	17		1	1	5
28	General Hospital Nova Gradiška	32	1	15		14				2
29	General Hospital Pakrac	3		2						1
30	Psychiatric Hospital Vrapče	1074	10	481	46	405	7	25	9	91
31	Psychiatric Hospital Rab	175		5		142	1	16	2	9
32	Psychiatric Hospital Ugljan	26				26
33	Psychiatric Hospital Sv. Ivan	293		67	3	190	1	4	1	27
34	Psychiatric Hospital Popovača	293		40	1	240		3	1	8
35	Psychiatric hospital for children and youth	4		2						2

[truncated: 2 more sheets: 2021 V, 2022 V]
